# Supplementary material for: GPER Agonist G1 Prevents Wnt-Induced JUN Upregulation in HT29 Colorectal Cancer Cells
Source: MDPI journal article supplement (doi:10.3390/ijms232012581), 2022-10-20
Supplement: s1 [file s1]

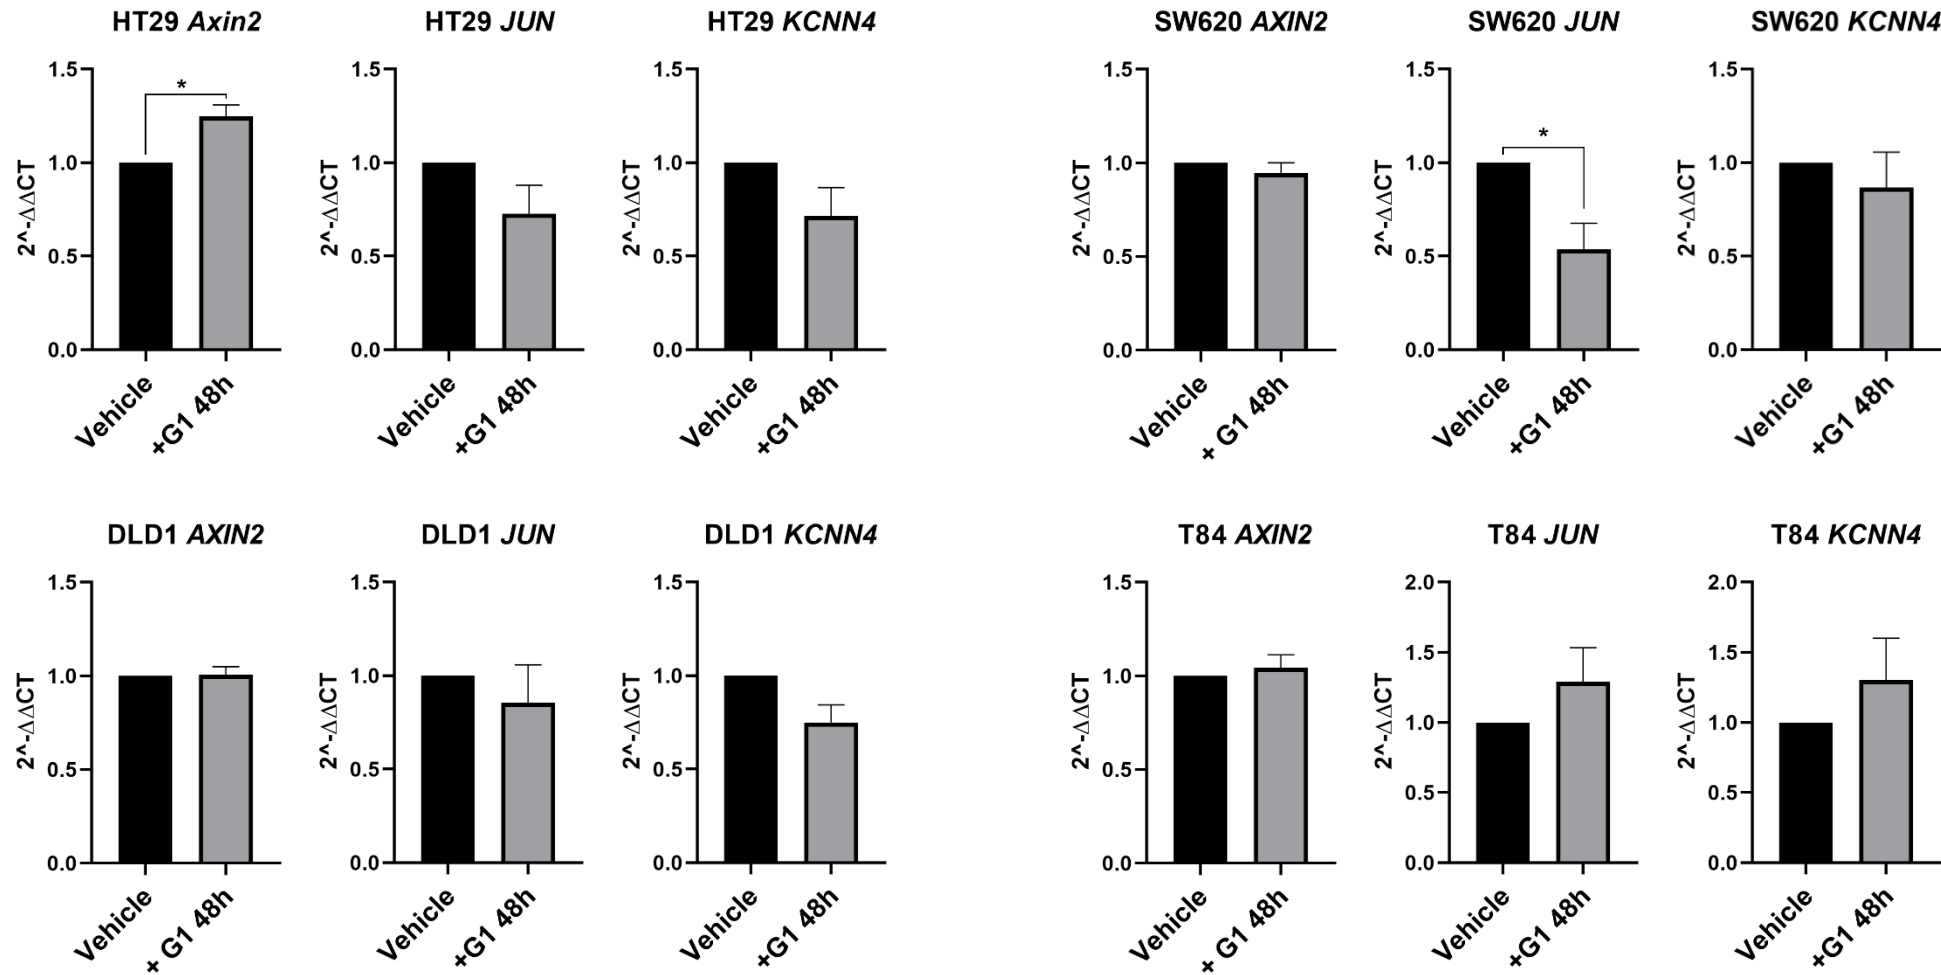

**Supplementary Figure S1: Wnt target gene expression in response to G1 treatment in multiple CRC cell lines**

HT29, SW620, DLD1 and T84 CRC cell lines were treated with 0.25μM G1 or Vehicle (DMSO) for 48h. RT-qPCR analysis shows that in HT29 cells G1 induced an increase in *AXIN2* and a small but not statistically significant decrease in *JUN* and *KCNN4* expression. In SW620 cells, G1 treatment also induced a decrease in *JUN* expression. No other statistically significant expression changes were detected in these cell lines under the conditions tested. Statistical analysis was by student t-test with  $n = 4$  for HT29, SW620 and DLD1 cells with each treatment and  $n = 3$  for T84 cells. Mean  $\pm$  SEM. \* $p < 0.05$ .
